# Supplementary material
Source: PubMed Central journal article supplement (PMC6612664)
Supplement: mmc1.pdf [file mmc1.pdf]

**YMTHE, Volume 27**

**Supplemental Information**

**Delivery of Anti-miRNA for Triple-Negative  
Breast Cancer Therapy Using RNA Nanoparticles  
Targeting Stem Cell Marker CD133**

**Hongran Yin, Gaofeng Xiong, Sijin Guo, Congcong Xu, Ren Xu, Peixuan Guo, and Dan Shu**

# Supplementary Figure. 1

**A.**

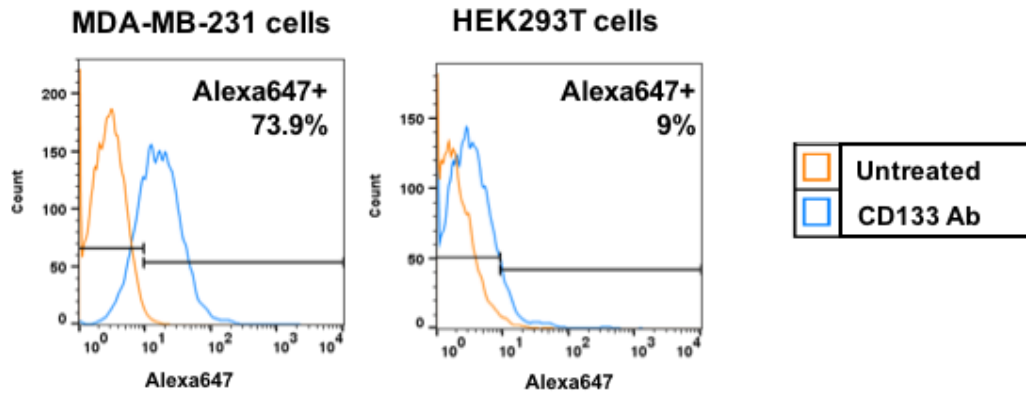

**B.**

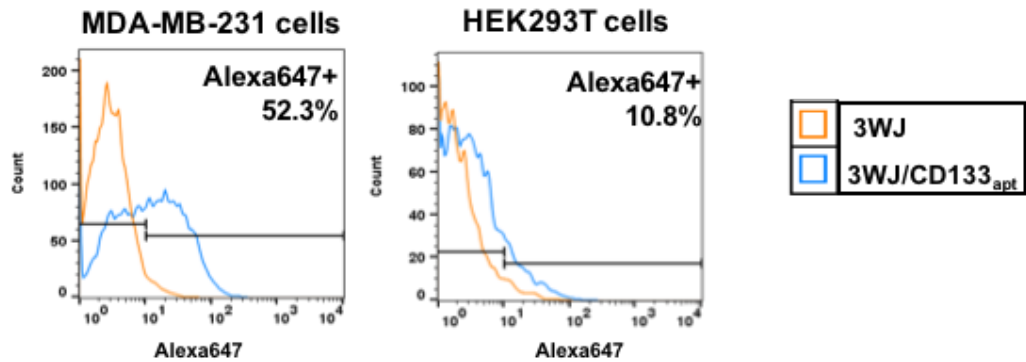

**C.**

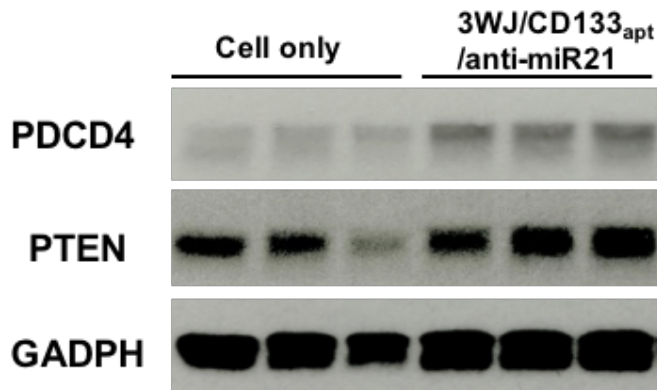

**Supplementary Figure. 1 A.** CD133 expression on MDA-MB-231 and HEK293T cell surface assayed by Flow Cytometry. **B.** Binding of 3WJ and 3WJ/CD133<sub>apt</sub> on MDA-MB-231 and HEK293T cells. **C.** Western Blot assay to study downstream gene expression in protein level in cell culture.
